# Supplementary material
Source: Research Square preprint supplement (doi:10.21203/rs.3.rs-9416415/v1)
Supplement: Supplementary file 1 [file 0e4966cbb26a9b1e3c3f0f1d.pdf]

**Table 1 – Baseline Characteristics**

| <b>Characteristic</b>            | <b>Hypertension Program (n=70)</b> | <b>Diabetes Program (n=24)</b> |
|----------------------------------|------------------------------------|--------------------------------|
| <b>Age</b>                       |                                    |                                |
| <i>Mean (SD)</i>                 | 59.5 (16.3)                        | 60.4 (12.2)                    |
| <i>Median [Min, Max]</i>         | 61.0 [-1.00, 90.0]                 | 58.0 [36.0, 85.0]              |
| <b>Sex</b>                       |                                    |                                |
| <i>Female</i>                    | 46 (65.7%)                         | 15 (62.5%)                     |
| <i>Male</i>                      | 24 (34.3%)                         | 9 (37.5%)                      |
| <b>Race</b>                      |                                    |                                |
| <i>Black or African American</i> | 66 (94.3%)                         | 21 (87.5%)                     |
| <i>White or Caucasian</i>        | 4 (5.7%)                           | 3 (12.5%)                      |
| <b>Smoking Status</b>            |                                    |                                |
| <i>Former</i>                    | 20 (28.6%)                         | 9 (37.5%)                      |
| <i>Never</i>                     | 39 (55.7%)                         | 12 (50.0%)                     |
| <i>Current</i>                   | 9 (12.9%)                          | 3 (12.5%)                      |
| <i>Unknown</i>                   | 2 (2.9%)                           |                                |
| <b>Height at Baseline (in)</b>   |                                    |                                |
| <i>Mean (SD)</i>                 | 65.3 (4.41)                        | 66.0 (3.55)                    |
| <i>Median [Min, Max]</i>         | 65.0 [57.0, 80.0]                  | 65.5 [60.0, 75.0]              |
| <i>Missing</i>                   | 1 (1.4%)                           |                                |
| <b>Weight at Baseline (kg)</b>   |                                    |                                |
| <i>Mean (SD)</i>                 | 96.1 (30.5)                        | 104 (25.8)                     |
| <i>Median [Min, Max]</i>         | 88.7 [54.4, 187]                   | 95.3 [69.4, 177]               |
| <i>Missing</i>                   | 2 (2.9%)                           | 1 (4.2%)                       |
| <b>Alcohol Use</b>               |                                    |                                |
| <i>No/Not Currently</i>          | 50 (71.4%)                         | 15 (62.5%)                     |
| <i>Never</i>                     | 3 (4.3%)                           | 1 (4.2%)                       |
| <i>Yes</i>                       | 15 (21.4%)                         | 8 (33.3%)                      |
| <i>Missing</i>                   | 2 (2.9%)                           |                                |
| <b>Work Status</b>               |                                    |                                |
| <i>Disabled</i>                  | 26 (37.1%)                         | 11 (45.8%)                     |
| <i>Retired</i>                   | 27 (38.6%)                         | 7 (29.2%)                      |
| <i>Full Time</i>                 | 7 (10.0%)                          | 1 (4.2%)                       |
| <i>Not Employed</i>              | 6 (8.6%)                           | 5 (20.8%)                      |
| <i>Part Time</i>                 | 4 (5.7%)                           |                                |
