# Supplementary material
Source: Research Square preprint supplement (doi:10.21203/rs.3.rs-9416415/v1)
Supplement: Supplementary file 2 [file cf720bab2c871d1b56067d42.pdf]

**Table 2. Clinical Outcomes Among Patients Completing RPM Programs**

| <b>Outcome</b>                    | <b>Baseline Mean (SD)</b> | <b>Final Mean (SD)</b> | <b>Mean Change</b> | <b>p-value</b> |
|-----------------------------------|---------------------------|------------------------|--------------------|----------------|
| <b>Hypertension Cohort (n=70)</b> |                           |                        |                    |                |
| Systolic BP (mmHg)                | 139.8 (20.5)              | 128.4 (17.2)           | -11.4              | 0.0001         |
| Diastolic BP (mmHg)               | 81.5 (12.9)               | 76.7 (17.5)            | -4.8               | 0.0434         |
| <b>Diabetes Cohort (n=24)</b>     |                           |                        |                    |                |
| Hemoglobin A1c (%)                | 9.79 (2.35)               | 8.37 (2.00)            | -1.42              | 0.0192         |
